# Supplementary material for: Mechanistic insight into methane dry reforming over cobalt: a density functional theory study
Source: Royal Society of Chemistry journal article supplement (doi:10.1039/c9cp07003f), 2020-01-01
Supplement: c9cp07003f1.pdf [file c9cp07003f1.pdf]

Supplementary for

Mechanistic Insight into Methane Dry Reforming over Cobalt: A Density  
Functional Theory Study

Heyuan Huang,<sup>ab</sup> Yingzhe Yu,<sup>ab</sup> and Minhua Zhang\*<sup>ab</sup>

Table S1. The elementary processes and corresponding kinetic parameters for DRM over Co(0001)

| Elementary processes                                                 | $E_{a,f}$ (eV) | $E_{a,r}$ (eV) | $\nu_{0,f}$ (s <sup>-1</sup> ) | $\nu_{0,r}$ (s <sup>-1</sup> ) |
|----------------------------------------------------------------------|----------------|----------------|--------------------------------|--------------------------------|
| $\text{CH}_4(\text{g}) + 2^* \rightarrow \text{CH}_3^* + \text{H}^*$ | 0.95           | 1.07           | 2.62E+9                        | 5.50E+13                       |
| $\text{CH}_3^* + ^* \rightarrow \text{CH}_2^* + \text{H}^*$          | 0.78           | 0.65           | 3.94E+13                       | 2.69E+13                       |
| $\text{CH}_2^* + \text{H}^* \rightarrow \text{CH}^* + ^*$            | 0.28           | 0.67           | 1.62E+13                       | 1.03E+13                       |
| $\text{CH}^* + ^* \rightarrow \text{C}^* + \text{H}^*$               | 1.15           | 0.82           | 2.29E+13                       | 3.46E+13                       |
| $\text{CO}_2(\text{g}) + ^* \rightarrow \text{CO}^* + \text{O}^*$    | 0.26           | 1.47           | 9.83E+8                        | 6.98E+13                       |
| $\text{CO}_2^* + \text{H}^* = \text{trans-COOH}^* + ^*$              | 1.15           | 1.16           | 1.97E+13                       | 8.56E+13                       |
| $\text{trans-COOH}^* = \text{cis-COOH}^*$                            | 0.79           | 0.50           | 2.17E+13                       | 6.04E+13                       |
| $\text{cis-COOH}^* + ^* = \text{CO}^* + \text{OH}^*$                 | 0.29           | 1.66           | 2.71E+13                       | 6.53E+13                       |
| $\text{CH}_3^* + \text{O}^* = \text{CH}_3\text{O}^* + ^*$            | 1.99           | 1.50           | 4.39E+13                       | 5.37E+13                       |
| $\text{CH}_2^* + \text{O}^* = \text{CH}_2\text{O}^* + ^*$            | 1.97           | 1.32           | 8.49E+12                       | 4.38E+12                       |
| $\text{CH}^* + \text{O}^* = \text{CHO}^* + ^*$                       | 1.34           | 0.68           | 8.77E+12                       | 1.43E+13                       |
| $\text{C}^* + \text{O}^* = \text{CO}^* + ^*$                         | 1.64           | 2.53           | 7.29E+13                       | 1.12E+13                       |
| $\text{CH}_3^* + \text{OH}^* = \text{CH}_3\text{OH}^* + ^*$          | 2.37           | 1.60           | 6.38E+12                       | 9.38E+12                       |
| $\text{CH}_2^* + \text{OH}^* = \text{CH}_2\text{OH}^*$               | 1.57           | 0.84           | 9.64E+12                       | 1.08E+12                       |
| $\text{CH}^* + \text{OH}^* = \text{CHOH}^* + ^*$                     | 1.88           | 1.07           | 4.36E+12                       | 7.86E+12                       |
| $\text{C}^* + \text{OH}^* = \text{COH}^* + ^*$                       | 1.27           | 1.52           | 6.72E+12                       | 9.82E+12                       |
| $\text{CH}_3\text{OH}^* + ^* = \text{CH}_2\text{OH}^* + \text{H}^*$  | 1.16           | 1.04           | 3.82E+13                       | 1.92E+13                       |
| $\text{CH}_2\text{OH}^* + ^* = \text{CHOH}^* + \text{H}^*$           | 0.62           | 0.94           | 9.81E+12                       | 8.92E+12                       |
| $\text{CHOH}^* + ^* = \text{COH}^* + \text{H}^*$                     | 0.07           | 0.83           | 1.07E+13                       | 2.45E+13                       |
| $\text{COH}^* + ^* = \text{CO}^* + \text{H}^*$                       | 0.95           | 1.20           | 2.38E+13                       | 6.74E+12                       |
| $\text{CH}_3\text{OH}^* + ^* = \text{CH}_3\text{O}^* + \text{H}^*$   | 0.93           | 1.64           | 2.32E+13                       | 4.31E+13                       |
| $\text{CH}_2\text{OH}^* + ^* = \text{CH}_2\text{O}^* + \text{H}^*$   | 0.57           | 0.89           | 1.92E+12                       | 9.28E+12                       |
| $\text{CHOH}^* + ^* = \text{CHO}^* + \text{H}^*$                     | 1.05           | 1.42           | 4.35E+13                       | 2.85E+13                       |
| $\text{CH}_3\text{O}^* + ^* = \text{CH}_2\text{O}^* + \text{H}^*$    | 0.98           | 0.54           | 1.76E+13                       | 1.27E+13                       |
| $\text{CH}_2\text{O}^* + ^* = \text{CHO}^* + \text{H}^*$             | 0.42           | 0.74           | 3.87E+13                       | 2.81E+13                       |
| $\text{CHO}^* + ^* = \text{CO}^* + \text{H}^*$                       | 0.16           | 1.34           | 2.21E+13                       | 8.81E+12                       |
| $\text{O}^* + \text{H}^* = ^*\text{OH}^* + ^*$                       | 1.37           | 1.05           | 1.31E+13                       | 1.42E+14                       |
| $\text{OH}^* + \text{H}^* = \text{H}_2\text{O}^* + ^*$               | 1.50           | 0.85           | 2.68E+14                       | 1.95E+14                       |
| $\text{OH}^* + \text{OH}^* = \text{H}_2\text{O}^* + \text{O}^*$      | 0.98           | 0.70           | 2.29E+13                       | 2.03E+13                       |
| $2\text{H}^* = \text{H}_2^* + ^*$                                    | 1.00           | 1.14           | 8.78E+12                       | 1.82E+13                       |

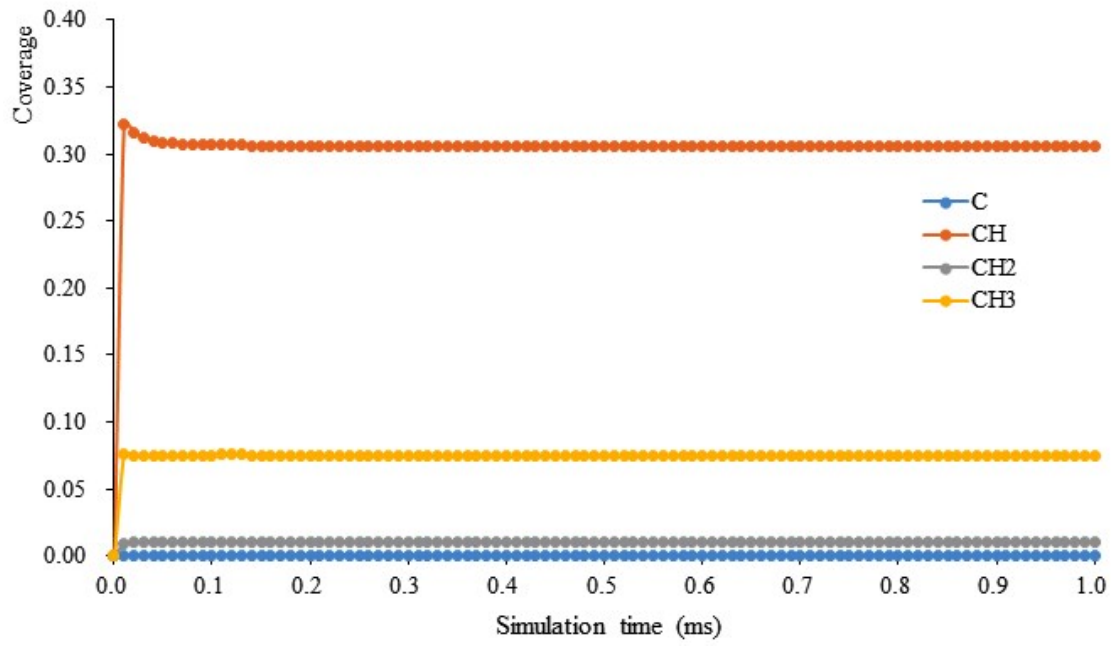

Fig. S1. The change of coverage of CH<sub>x</sub>(x=0-3) over time within 1.0 ms simulation time on Co(0001)
